# Supplementary material
Source: publisher figshare collection journal article supplement (https://springernature.figshare.com/ndownloader/files/23496774)
Supplement: Supplementary file [file 23496774]

#### ADDITIONAL FILE 4. Criteria to assess the credibility of subgroup analyses (Sun et al, 2010)(1).

##### DESIGN

1. Is the subgroup variable a characteristic measured at baseline or after randomisation?
2. Is the effect suggested by comparisons within rather than between studies?
3. Was the hypothesis specified a priori?
4. Was the direction of the subgroup effect specified a priori?
5. Was the subgroup effect one of a small number of hypothesised effects tested?

##### ANALYSIS

6. Does the interaction test suggest a low likelihood that chance explains the apparent subgroup effect?
7. Is the significant subgroup effect independent?

##### CONTEXT

8. Is the size of the subgroup effect large?
9. Is the interaction consistent across studies?
10. Is the interaction consistent across closely related outcomes within the study?
11. Is there indirect evidence that supports the hypothesised interaction (biological rationale)?

1. Sun X, Briel M, Walter SD, Guyatt GH. Is a subgroup effect believable? Updating criteria to evaluate the credibility of subgroup analyses. *BMJ*. 2010;340:c117.
